# Supplementary material for: CNDs@zeolite: new room-temperature phosphorescent materials derived by pyrolysis of organo-templated zeolites
Source: Royal Society of Chemistry journal article supplement (doi:10.1039/c7tc03487c), 2017-01-01
Supplement: c7tc03487c1.pdf [file c7tc03487c1.pdf]

## **Electronic Supplementary Information for:**

### **CNDs@Zeolite: New Room Temperature Phosphorescence Materials Derived by Pyrolysis of Organo-Templated Zeolites**

Y. Mu, H. Shi, Y. Wang, H. Ding and J. Li\*

State Key Laboratory of Inorganic Synthesis and Preparative Chemistry, College of  
Chemistry, Jilin University, Changchun 130012, P. R. China. Fax: (+86) 431-85168624;

E-mail: [lijiyang@jlu.edu.cn](mailto:lijiyang@jlu.edu.cn)

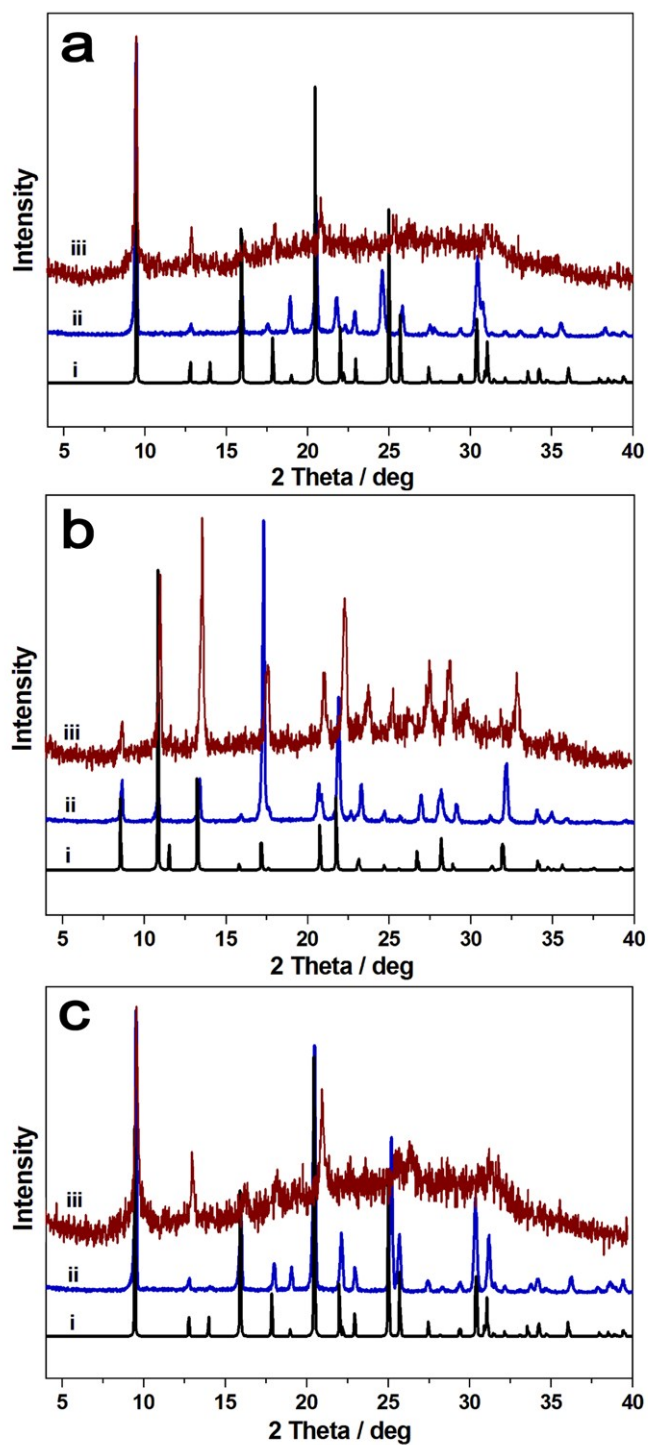

**Fig. S1.** Powder X-ray diffraction patterns of (a) *N*-methylpiperidine templated CHA zeolite (b) *N*-methylpiperidine templated LEV zeolite and (c) *N*-methylmorpholine templated CHA zeolite. (i) simulated and (ii) as-synthesized zeolites, (iii) CNDs@zeolite composites.

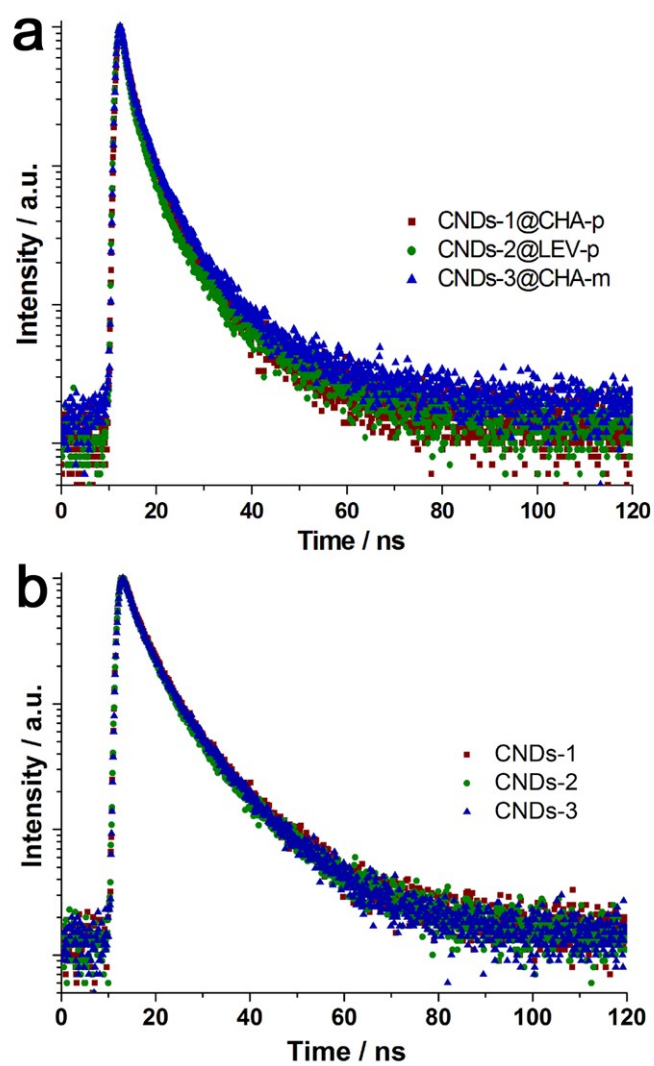

**Fig. S2.** Time-resolved fluorescence decay curves of (a) CNDs@zeolite composites and (b) isolated CNDs detected at 450 nm with excitation at 370 nm.

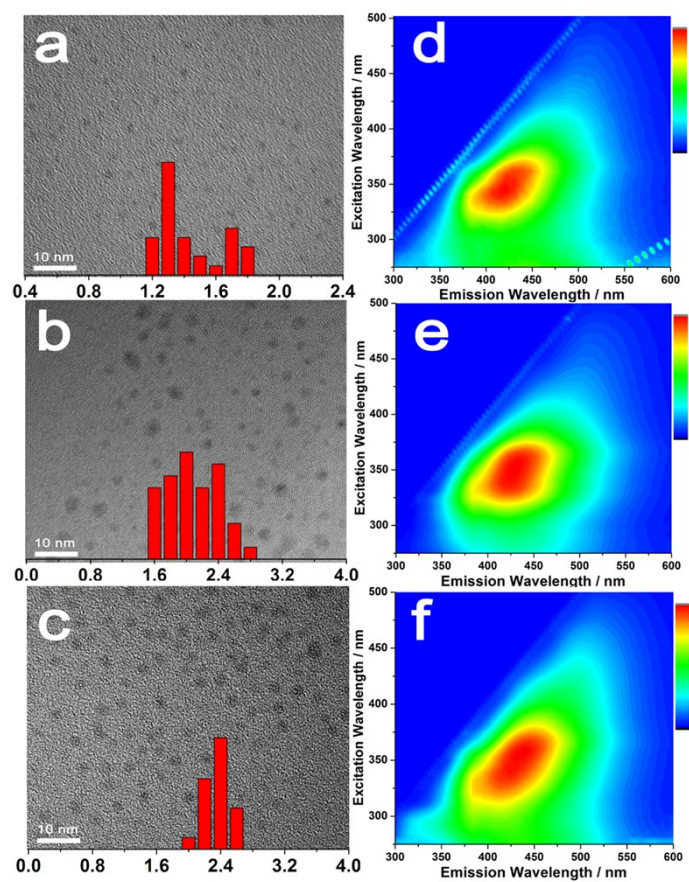

**Fig. S3.** TEM images (a-c) and fluorescence EEMs (d-f) of CNDs-1, CNDs-2, CNDs-3, respectively. Emission intensity rises from blue to green and to red. Insets in a-c show the size distribution.

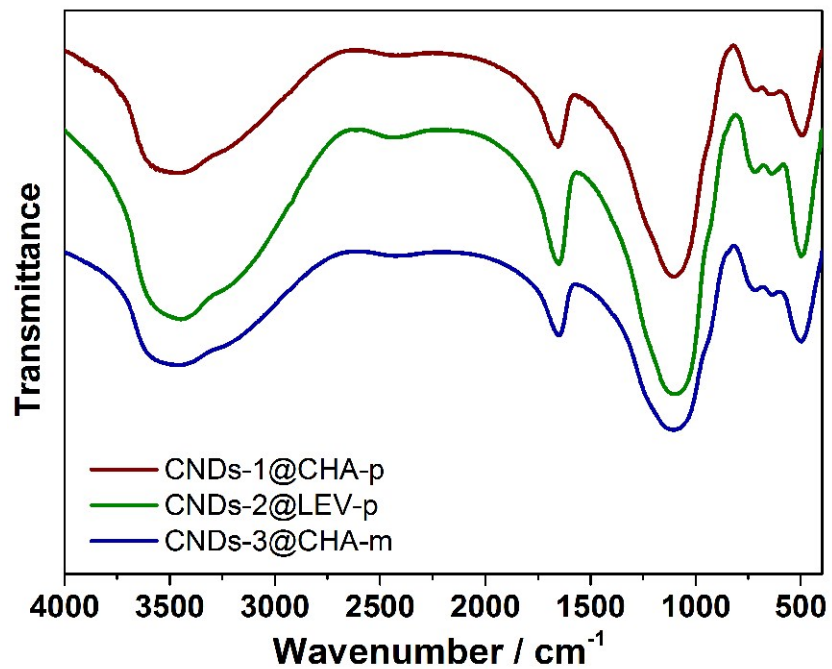

Fig. S4. FTIR spectra of CNDs@zeolite composites.

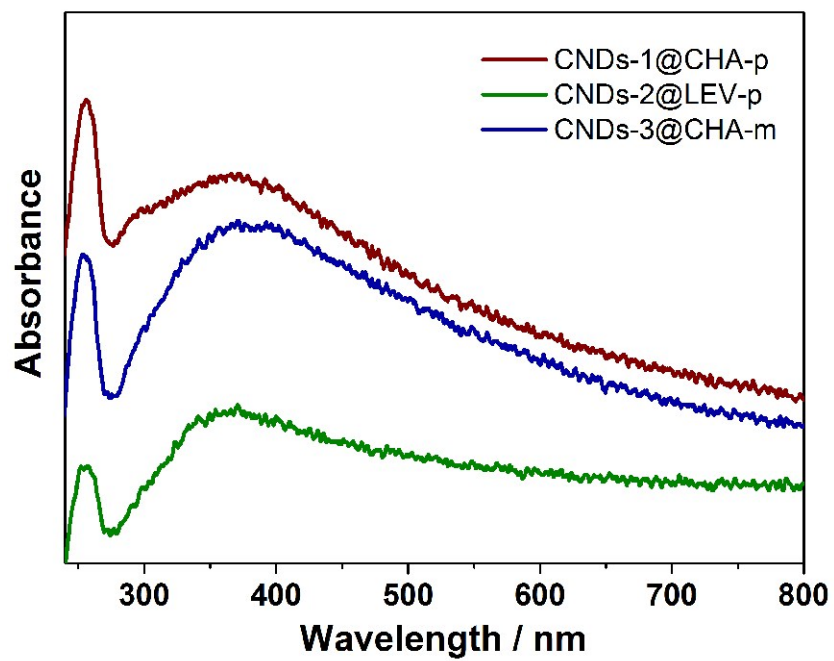

**Fig. S5.** UV-vis absorbance spectra of CNDs@zeolite composites.

**Table S1.** Fitting parameters of time-resolved fluorescence decay traces of CNDs@zeolite composites and isolated CNDs

|              | $\tau_1$ / ns | $B_1$ / % | $\tau_2$ / ns | $B_2$ / % | $\tau_3$ / ns | $B_3$ / % | $\tau_{avg}$ / ns | CHISQ |
|--------------|---------------|-----------|---------------|-----------|---------------|-----------|-------------------|-------|
| CNDs-1@CHA-p | 1.6           | 60        | 4.6           | 37        | 15.2          | 3         | 3.0               | 1.2   |
| CNDs-1       | 2.5           | 42        | 5.5           | 48        | 13.1          | 10        | 5.0               | 1.0   |
| CNDs-2@LEV-p | 1.3           | 67        | 4.3           | 31        | 16.1          | 2         | 2.6               | 1.2   |
| CNDs-2       | 2.0           | 34        | 5.0           | 58        | 13.9          | 8         | 4.7               | 1.0   |
| CNDs-3@CHA-m | 1.3           | 55        | 4.5           | 42        | 14.9          | 3         | 3.1               | 1.1   |
| CNDs-3       | 2.4           | 44        | 5.5           | 44        | 12.1          | 12        | 4.9               | 1.0   |

$\lambda_{ex}$  = 370 nm and  $\lambda_{em}$  = 450 nm

**Table S2.** Percentage (%) of C-C/C=C, C-N/C-O and C=N/C=O/O-C=O in CNDs@zeolite composites as determined by XPS measurements.

---

|               | CNDs-1@CHA-p | CNDs-2@LEV-p | CNDs-3@CHA-m |
|---------------|--------------|--------------|--------------|
| C-C/C=C       | 78.0         | 83.4         | 83.6         |
| C-N/C-O       | 18.7         | 14.2         | 12.2         |
| C=N/C=O/O-C=O | 3.3          | 2.4          | 4.2          |

---



**Table S3.** Fitting parameters of time-resolved phosphorescence decay traces of CNDs@zeolite composites

|              | $\tau_1$ / ms | $B_1$ / % | $\tau_2$ / ms | $B_2$ / % | $\tau_3$ / ms | $B_3$ / % | $\tau_{\text{avg}}$ / ms | CHISQ |
|--------------|---------------|-----------|---------------|-----------|---------------|-----------|--------------------------|-------|
| CNDs-1@CHA-p | 5.8           | 73        | 56            | 20        | 405           | 7         | 277                      | 1.1   |
| CNDs-2@LEV-p | 5.0           | 76        | 50            | 18        | 400           | 6         | 273                      | 1.1   |
| CNDs-3@CHA-m | 3.1           | 76        | 38            | 18        | 416           | 6         | 312                      | 1.2   |

$\lambda_{\text{ex}} = 365$  nm and  $\lambda_{\text{em}} = 510$  nm
